# Supplementary material for: An impact-insensitive fiber optic current transformer based on polarization maintaining photonic crystal fiber delay coil
Source: Frontiers journal article supplement (doi:10.3389/fphy.2023.1192965), 2023-05-09
Supplement: Table_1.DOCX [file Table_1.DOCX]

Supplementary Material

An Impact Insensitive Fiber Optic Current Transformer Based on Polarization Maintaining Photonic Crystal Fiber Delay Coil

Hongze Gao1, Guochen Wang1*, Wei Gao1, She Li2, Bo Zhao1, 3, Runfeng Zhang3, Boya Zhang4, and Fan Yang5

1School of Instrumentation Science and Engineering, Harbin Institute of Technology, Harbin, 150001, China

2College of Science, Heilongjiang University of Science and Technology, Harbin 150022, China

3HIT (An Shan) institute of industrial technology, Anshan, 114000, China

4Military Office of Rocket Armaments Department in Harbin District, Harbin 150000, China

5Shaanxi Dongfang Aviation Instrument Co.Ltd., Hanzhong, 723000, China

*** Correspondence:**Guochen Wang
wanggc@hit.edu.cn

# The specific results in dynamic equation

This part shows the specific values of all the symbols in equation (7) and (8).

(S1)

The solutions of impact force *Fn* of nth layer PMF delay coil at two stages 0 < *t* ≤ *τ* (*F*1*n*) and *t* > *τ* (*F*2*n*):

(S2)
